# Supplementary material for: A Novel Sphingosine Kinase Inhibitor Suppresses Chikungunya Virus Infection
Source: MDPI journal article supplement (doi:10.3390/v14061123), 2022-05-24

### Supplementary Figure Legends

Supplementary Figure S1. A) Table showing SK inhibitors screened for anti-CHIKV activity along with isoform selectivity. B) Structure of screened compounds from C) along with references.

Supplementary Figure S2. SLL3071511 remains effective at higher CHIKV MOI. A) Representative images of SLL3071511 inhibition of CHIKV infection were collected using the Operetta CLS microscope (20x objective). HeLa cells were pre-treated for 1 hour at the indicated concentrations and then infected with CHIKV (MOI = 10) for 24 hours. Staining was done for viral nonstructural protein (nsP3, green), nucleus (Hoechst33342, blue), and cytoplasm (CellMask, red). Images were obtained on the Operetta CLS confocal microscope (20x objective), and analysis was done using the Harmony software. Data represent means ( $\pm$  SD) from one representative experiment of at least two independent experiments performed in duplicate. B) Percent viability of HeLa cells following CHIKV inhibition was calculated using mock-infected cells as reference.

Supplementary Figure S3. Viral glycoprotein expression is also decreased with SLL3071511 treatment. A) Representative images of SLL3071511 inhibition of CHIKV infection were collected using the Operetta CLS microscope (20x objective). HeLa cells were pre-treated for 1 hour at the indicated inhibitor concentrations and then infected with CHIKV (MOI = 1) for 24 hours. Staining was done for viral structural protein (E2, green), nucleus (Hoechst33342, blue), and cytoplasm (CellMask, red). Images were obtained on the Operetta CLS confocal microscope (20x objective), and analysis was done using the Harmony software. B) Percent viability of HeLa cells and inhibition of CHIKV infection was calculated using mock-infected cells as reference.

## Supplementary Figure S1

### A) Table identifying SK inhibitors screened for CHIKV inhibitory activity along with isoform selectivity

| Identifier | Compound   | Selectivity |
|------------|------------|-------------|
| 1          | SLC4011540 | Dual        |
| 2          | SLC4091423 | SK2         |
| 3          | SLC4091425 | Unknown     |
| 4          | SLC4101431 | SK2         |
| 5          | SLC5091612 | Unknown     |
| 6          | SLC5101464 | Unknown     |
| 7          | SLC5101465 | SK1         |
| 8          | SLC5111312 | Dual        |
| 9          | SLL3041783 | SK1         |
| 10         | SLL3071511 | SK1         |
| 11         | SLM6031434 | SK2         |
| 12         | SLM6071469 | SK2         |
| 13         | SLM6081456 | Unknown     |
| 14         | SLP101417  | Unknown     |
| 15         | SLP120701  | SK2         |
| 16         | SLP7111228 | SK1         |
| 17         | SLP9081411 | Unknown     |
| 18         | SLR080811  | SK2         |
| 19         | SLS1081832 | Unknown     |

### B) Structures of Sphingosine Kinase Inhibitors and associated publications.

Childress, E.; Kharel, Y.; Brown, A.; Bevan, D.R.; Lynch, K.R.; Santos, W.L. Transforming Sphingosine Kinase 1 Inhibitors into Dual and Sphingosine Kinase 2 Selective Inhibitors: Design, Synthesis, and In Vivo Activity. *J. Med. Chem.* **2017**, *60*, 3933-3957.

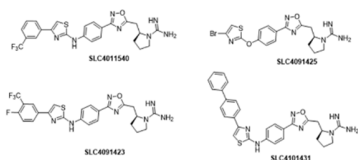

Congdon, M.; Fritzemeier, R.G.; Kharel, Y.; Brown, A.M.; Serbulea, V.; Bevan, D.R.; Lynch, K.R.; Santos, W.L. Probing the Substitution Pattern of Indole-Based Scaffold Reveal Potent and Selective Sphingosine Kinase 2 Inhibitors. *Eur. J. Med. Chem.* **2021**, *212*, 113121.

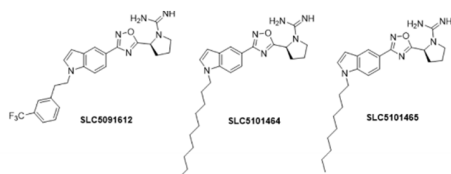

Congdon, M.; Kharel, Y.; Brown, A.; Lewis, S.L.; Bevan, D.R.; Lynch, K.R. and Santos, W.L. Structure-activity relationship studies and molecular modeling of naphthalene-based sphingosine kinase 2 inhibitors. *ACS Med. Chem. Lett.* **2016**, *7*, 229-234.

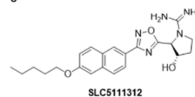

Li, H.; Sibley, C.D.; Kharel, Y.; Huang, T.; Brown, A.M.; Wonilowicz, L.G.; Bevan, D.R.; Lynch, K.R.; Santos, W.L. Lipophilic Tail Modifications of 2-(hydroxymethyl)pyrrolidine Scaffold Reveal Dual Sphingosine Kinase 1 and 2 Inhibitors. *Bioorg. Med. Chem.* **2021**, *30*, 115941.

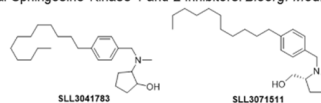

Sibley, C.D.; Morris, E.A.; Kharel, Y.; Brown, A.M.; Bevan, D.R.; Lynch, K.R.; Santos, W.L. Discovery of a Small Side Cavity in Sphingosine Kinase 2 that Enhances Inhibitor Potency and Selectivity. *J. Med. Chem.* **2020**, *63*, 1178-1198.

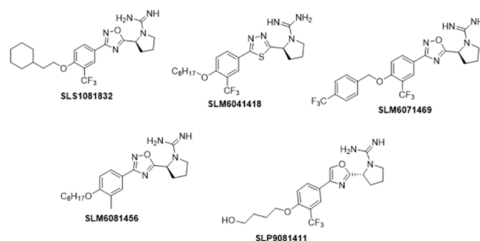

Supplementary Figure S2

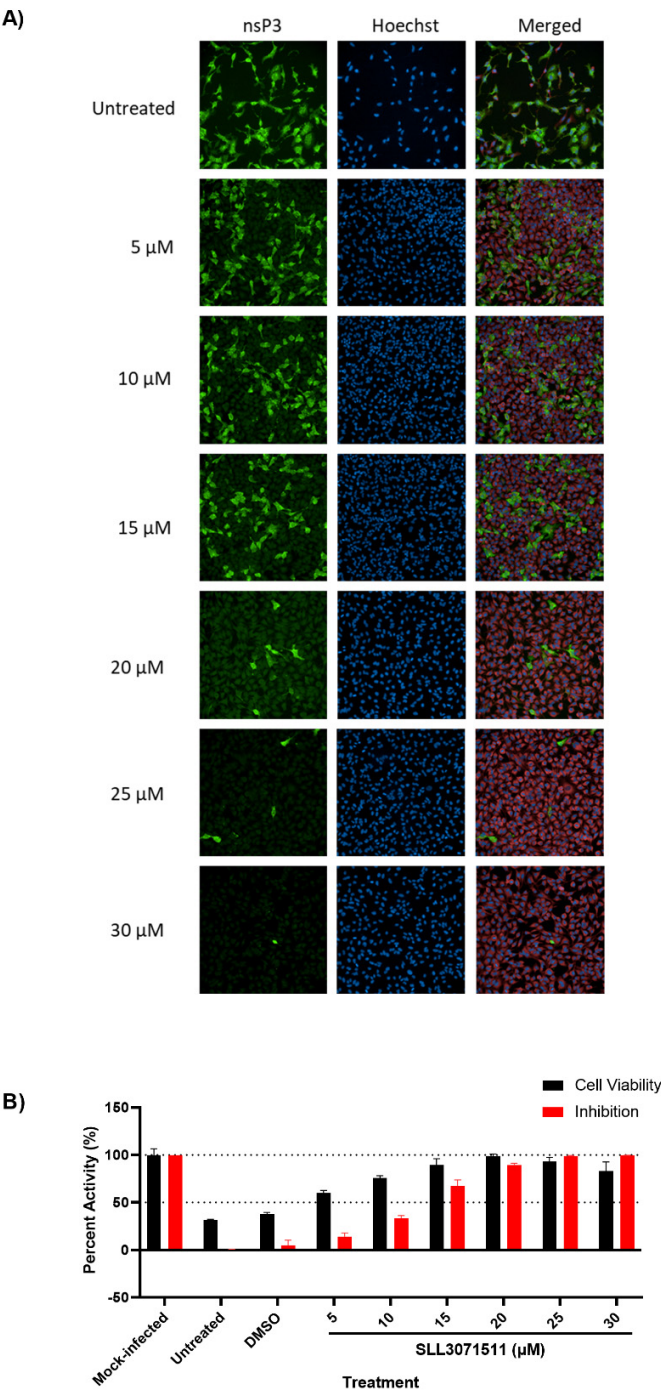

Supplementary Figure S3

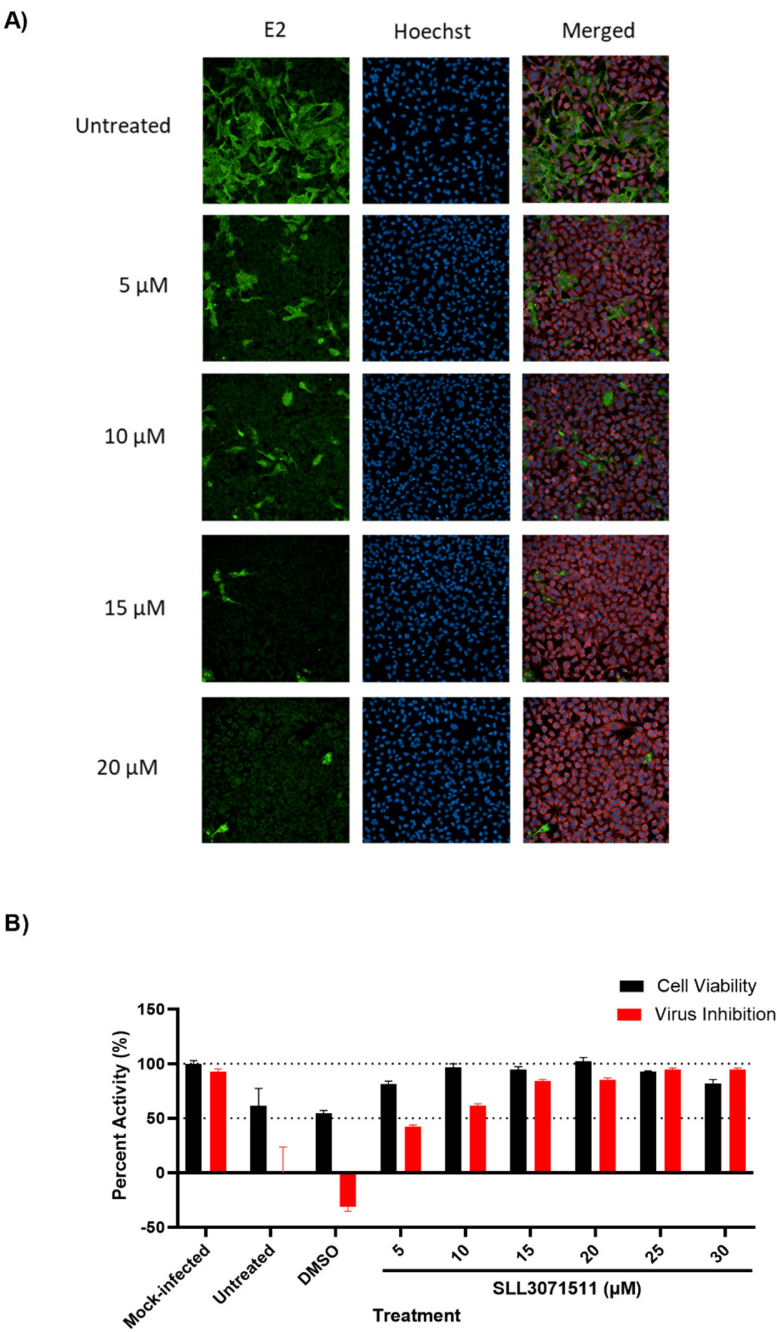

Supplement: s1 [file s1]
